# Supplementary material for: A Practical Approach for Predicting Antimicrobial Phenotype Resistance in Staphylococcus aureus Through Machine Learning Analysis of Genome Data
Source: Front Microbiol. 2022 Mar 2;13:841289. doi: 10.3389/fmicb.2022.841289 (PMC8924536; doi:10.3389/fmicb.2022.841289)
Supplement: Supplementary file 3 [file Table_3.XLSX]

## Sheet: Table S23
Table S26
strain_id	sequencing_instrument	MLST	Resistant phenotype	specimen_type	country	state
13B07	Illumina Nextseq 550	239	MRSA	Blood	China	Beijing
1802B01	NovaSeq	59	MRSA	Blood	China	Guangdong
1802B76	NovaSeq	59	MRSA	Blood	China	Guangdong
1803B14	NovaSeq	59	MRSA	Blood	China	Guangdong
1803H17	NovaSeq	59	MRSA	Sputum	China	Guangdong
1806A14	NovaSeq	239	MRSA	Abdominal fluid	China	Shanxi
1806A20	NovaSeq	239	MRSA	Abdominal fluid	China	Shanxi
1806B35	NovaSeq	239	MRSA	Blood	China	Shanxi
1808B04	NovaSeq	59	MRSA	Blood	China	Hunan
1808B08	NovaSeq	59	MRSA	Blood	China	Hunan
1810B54	NovaSeq	59	MRSA	Blood	China	Beijing
1810H38	NovaSeq	239	MRSA	Sputum	China	Beijing
1810H39	NovaSeq	59	MRSA	Sputum	China	Beijing
1811H12	NovaSeq	59	MRSA	Sputum	China	Hubei
1811H55	NovaSeq	59	MRSA	Sputum	China	Hubei
1812B41	NovaSeq	239	MRSA	Blood	China	Shandong
1901BS02	Hiseq Xten	59	MRSA	Blood	China	Beijing
1901BS03	Hiseq Xten	338	MRSA	Blood	China	Beijing
1901BS04	Hiseq Xten	59	MRSA	Blood	China	Beijing
1901BS05	Hiseq Xten	59	MRSA	Blood	China	Beijing
1901BS07	Hiseq Xten	1232	MRSA	Blood	China	Beijing
1901BS09	Hiseq Xten	59	MRSA	Blood	China	Beijing
1901BS10	Hiseq Xten	338	MRSA	Blood	China	Beijing
1901BS12	Hiseq Xten	5	MRSA	Blood	China	Beijing
1901BS13	Hiseq Xten	59	MRSA	Blood	China	Beijing
1901BS14	Hiseq Xten	59	MRSA	Blood	China	Beijing
1901BS16	Hiseq Xten	7	MSSA	Blood	China	Beijing
1901BS18	Hiseq Xten	188	MSSA	Blood	China	Beijing
1901BS21	Hiseq Xten	22	MSSA	Blood	China	Beijing
1901BS22	Hiseq Xten	15	MSSA	Blood	China	Beijing
1901BS23	Hiseq Xten	398	MSSA	Blood	China	Beijing
1901BS25	Hiseq Xten	965	MSSA	Blood	China	Beijing
1901BS26	Hiseq Xten	22	MSSA	Blood	China	Beijing
1901BS27	Hiseq Xten	5	MSSA	Blood	China	Beijing
1901BS28	Hiseq Xten	22	MSSA	Blood	China	Beijing
1901BS32	Hiseq Xten	188	MSSA	Blood	China	Beijing
1901BS33	Hiseq Xten	2631	MSSA	Blood	China	Beijing
1901BS34	Hiseq Xten	15	MSSA	Blood	China	Beijing
1901BS35	Hiseq Xten	22	MSSA	Blood	China	Beijing
1902BS01	Hiseq Xten	398	MSSA	Blood	China	Beijing
1902BS02	Hiseq Xten	59	MRSA	Blood	China	Beijing
1902BS05	Hiseq Xten	188	MSSA	Blood	China	Beijing
1902BS07	Hiseq Xten	6	MSSA	Blood	China	Beijing
1902BS08	Hiseq Xten	630	MSSA	Blood	China	Beijing
1902BS09	Hiseq Xten	59	MRSA	Blood	China	Beijing
1902BS11	Hiseq Xten	15	MSSA	Blood	China	Beijing
1902BS12	Hiseq Xten	15	MSSA	Blood	China	Beijing
1902BS14	Hiseq Xten	239	MRSA	Blood	China	Beijing
1902BS16	Hiseq Xten	5	MRSA	Blood	China	Beijing
1902BS17	Hiseq Xten	7	MSSA	Blood	China	Beijing
1902BS18	Hiseq Xten	965	MSSA	Blood	China	Beijing
1902BS19	Hiseq Xten	5	MRSA	Blood	China	Beijing
1902BS20	Hiseq Xten	398	MSSA	Blood	China	Beijing
1902BS24	Hiseq Xten	22	MSSA	Blood	China	Beijing
1903BS01	Hiseq Xten	1	MSSA	Blood	China	Zhejiang
1903BS02	Hiseq Xten	59	MRSA	Blood	China	Zhejiang
1903BS04	Hiseq Xten	1	MSSA	Blood	China	Zhejiang
1903BS07	Hiseq Xten	5	MSSA	Blood	China	Zhejiang
1903BS08	Hiseq Xten	15	MSSA	Blood	China	Zhejiang
1903BS09	Hiseq Xten	6	MSSA	Blood	China	Zhejiang
1903BS10	Hiseq Xten	630	MSSA	Blood	China	Zhejiang
1903BS11	Hiseq Xten	7	MSSA	Blood	China	Zhejiang
1903BS12	Hiseq Xten	398	MRSA	Blood	China	Zhejiang
1903BS13	Hiseq Xten	1	MSSA	Blood	China	Zhejiang
1903BS14	Hiseq Xten	398	MRSA	Blood	China	Zhejiang
1903BS15	Hiseq Xten	7	MSSA	Blood	China	Zhejiang
1903BS17	Hiseq Xten	398	MSSA	Blood	China	Zhejiang
1903BS18	Hiseq Xten	965	MRSA	Blood	China	Zhejiang
1903BS19	Hiseq Xten	1	MRSA	Blood	China	Zhejiang
1903BS20	Hiseq Xten	1281	MSSA	Blood	China	Zhejiang
1903BS21	Hiseq Xten	6	MSSA	Blood	China	Zhejiang
1903BS23	Hiseq Xten	188	MSSA	Blood	China	Zhejiang
1903BS24	Hiseq Xten	5	MRSA	Blood	China	Zhejiang
1903BS26	Hiseq Xten	22	MSSA	Blood	China	Zhejiang
1903BS27	Hiseq Xten	188	MSSA	Blood	China	Zhejiang
1903BS28	Hiseq Xten	5	MRSA	Blood	China	Zhejiang
1903BS29	Hiseq Xten	15	MSSA	Blood	China	Zhejiang
1903BS30	Hiseq Xten	7	MSSA	Blood	China	Zhejiang
1903BS31	Hiseq Xten	59	MRSA	Blood	China	Zhejiang
1904BS02	Hiseq Xten	22	MSSA	Blood	China	Guangdong
1904BS03	Hiseq Xten	59	MRSA	Blood	China	Guangdong
1904BS05	Hiseq Xten	1281	MSSA	Blood	China	Guangdong
1904BS06	Hiseq Xten	59	MRSA	Blood	China	Guangdong
1904BS08	Hiseq Xten	2990	MSSA	Blood	China	Guangdong
1904BS09	Hiseq Xten	764	MRSA	Blood	China	Guangdong
1904BS15	Hiseq Xten	4441	MSSA	Blood	China	Guangdong
1904BS16	Hiseq Xten	5	MSSA	Blood	China	Guangdong
1904BS18	Hiseq Xten	2990	MSSA	Blood	China	Guangdong
1904BS19	Hiseq Xten	764	MRSA	Blood	China	Guangdong
1904BS22	Hiseq Xten	7	MSSA	Blood	China	Guangdong
1904BS23	Hiseq Xten	764	MRSA	Blood	China	Guangdong
1904BS24	Hiseq Xten	764	MRSA	Blood	China	Guangdong
1904BS25	Hiseq Xten	338	MRSA	Blood	China	Guangdong
1904BS26	Hiseq Xten	15	MSSA	Blood	China	Guangdong
1904BS28	Hiseq Xten	398	MRSA	Blood	China	Guangdong
1904BS33	Hiseq Xten	1	MSSA	Blood	China	Guangdong
1904BS35	Hiseq Xten	7	MSSA	Blood	China	Guangdong
1905BS01	Hiseq Xten	239	MRSA	Blood	China	Hubei
1905BS02	Hiseq Xten	5	MRSA	Blood	China	Hubei
1905BS03	Hiseq Xten	59	MRSA	Blood	China	Hubei
1905BS05	Hiseq Xten	7	MSSA	Blood	China	Hubei
1905BS07	Hiseq Xten	1281	MSSA	Blood	China	Hubei
1905BS08	Hiseq Xten	5	MRSA	Blood	China	Hubei
1905BS09	Hiseq Xten	6	MSSA	Blood	China	Hubei
1905BS11	Hiseq Xten	239	MRSA	Blood	China	Hubei
1905BS12	Hiseq Xten	15	MSSA	Blood	China	Hubei
1905BS13	Hiseq Xten	1821	MSSA	Blood	China	Hubei
1905BS15	Hiseq Xten	1	MSSA	Blood	China	Hubei
1905BS17	Hiseq Xten	59	MRSA	Blood	China	Hubei
1905BS19	Hiseq Xten	59	MRSA	Blood	China	Hubei
1905BS20	Hiseq Xten	239	MRSA	Blood	China	Hubei
1905BS22	Hiseq Xten	59	MRSA	Blood	China	Hubei
1905BS25	Hiseq Xten	5	MRSA	Blood	China	Hubei
1905BS28	Hiseq Xten	59	MRSA	Blood	China	Hubei
1905BS30	Hiseq Xten	7	MSSA	Blood	China	Hubei
1905BS33	Hiseq Xten	398	MRSA	Blood	China	Hubei
1906BS02	Hiseq Xten	22	MSSA	Blood	China	Shandong
1906BS04	Hiseq Xten	7	MSSA	Blood	China	Shandong
1906BS05	Hiseq Xten	59	MRSA	Blood	China	Shandong
1906BS06	Hiseq Xten	7	MSSA	Blood	China	Shandong
1906BS08	Hiseq Xten	398	MSSA	Blood	China	Shandong
1906BS09	Hiseq Xten	7	MSSA	Blood	China	Shandong
1906BS10	Hiseq Xten	22	MSSA	Blood	China	Shandong
1906BS11	Hiseq Xten	59	MRSA	Blood	China	Shandong
1906BS12	Hiseq Xten	239	MRSA	Blood	China	Shandong
1906BS14	Hiseq Xten	5	MSSA	Blood	China	Shandong
1906BS17	Hiseq Xten	398	MSSA	Blood	China	Shandong
1906BS18	Hiseq Xten	59	MRSA	Blood	China	Shandong
1906BS19	Hiseq Xten	22	MSSA	Blood	China	Shandong
1906BS20	Hiseq Xten	239	MRSA	Blood	China	Shandong
1906BS22	Hiseq Xten	22	MSSA	Blood	China	Shandong
1906BS23	Hiseq Xten	5	MSSA	Blood	China	Shandong
1906BS24	Hiseq Xten	1281	MSSA	Blood	China	Shandong
1906BS26	Hiseq Xten	5	MSSA	Blood	China	Shandong
1906BS27	Hiseq Xten	59	MRSA	Blood	China	Shandong
1906BS28	Hiseq Xten	22	MSSA	Blood	China	Shandong
1906BS29	Hiseq Xten	59	MRSA	Blood	China	Shandong
1906BS30	Hiseq Xten	22	MRSA	Blood	China	Shandong
1906BS31	Hiseq Xten	398	MSSA	Blood	China	Shandong
1906BS32	Hiseq Xten	7	MSSA	Blood	China	Shandong
1906BS34	Hiseq Xten	188	MSSA	Blood	China	Shandong
1906BS35	Hiseq Xten	22	MSSA	Blood	China	Shandong
1907BS01	Hiseq Xten	398	MRSA	Blood	China	Zhejiang
1907BS03	Hiseq Xten	1	MSSA	Blood	China	Zhejiang
1907BS04	Hiseq Xten	5	MRSA	Blood	China	Zhejiang
1907BS05	Hiseq Xten	398	MRSA	Blood	China	Zhejiang
1907BS07	Hiseq Xten	630	MSSA	Blood	China	Zhejiang
1907BS09	Hiseq Xten	1821	MRSA	Blood	China	Zhejiang
1907BS11	Hiseq Xten	15	MSSA	Blood	China	Zhejiang
1907BS13	Hiseq Xten	1	MSSA	Blood	China	Zhejiang
1907BS14	Hiseq Xten	5	MRSA	Blood	China	Zhejiang
1907BS15	Hiseq Xten	22	MRSA	Blood	China	Zhejiang
1907BS17	Hiseq Xten	398	MSSA	Blood	China	Zhejiang
1907BS18	Hiseq Xten	7	MSSA	Blood	China	Zhejiang
1907BS20	Hiseq Xten	5	MRSA	Blood	China	Zhejiang
1907BS21	Hiseq Xten	5	MRSA	Blood	China	Zhejiang
1907BS22	Hiseq Xten	630	MSSA	Blood	China	Zhejiang
1907BS23	Hiseq Xten	6	MSSA	Blood	China	Zhejiang
1907BS24	Hiseq Xten	7	MSSA	Blood	China	Zhejiang
1907BS25	Hiseq Xten	188	MSSA	Blood	China	Zhejiang
1907BS26	Hiseq Xten	1281	MSSA	Blood	China	Zhejiang
1907BS27	Hiseq Xten	188	MSSA	Blood	China	Zhejiang
1907BS28	Hiseq Xten	6	MSSA	Blood	China	Zhejiang
1907BS29	Hiseq Xten	630	MSSA	Blood	China	Zhejiang
1907BS30	Hiseq Xten	5	MRSA	Blood	China	Zhejiang
1907BS31	Hiseq Xten	5	MRSA	Blood	China	Zhejiang
1907BS32	Hiseq Xten	188	MSSA	Blood	China	Zhejiang
1907BS34	Hiseq Xten	7	MSSA	Blood	China	Zhejiang
1907BS35	Hiseq Xten	7	MSSA	Blood	China	Zhejiang
1907BS36	Hiseq Xten	59	MRSA	Blood	China	Zhejiang
1907BS38	Hiseq Xten	188	MSSA	Blood	China	Zhejiang
1907BS39	Hiseq Xten	5	MRSA	Blood	China	Zhejiang
1908BS02	Hiseq Xten	7	MSSA	Blood	China	Guangdong
1908BS03	Hiseq Xten	338	MRSA	Blood	China	Guangdong
1908BS04	Hiseq Xten	7	MSSA	Blood	China	Guangdong
1908BS07	Hiseq Xten	764	MRSA	Blood	China	Guangdong
1908BS09	Hiseq Xten	764	MRSA	Blood	China	Guangdong
1908BS10	Hiseq Xten	7	MSSA	Blood	China	Guangdong
1908BS11	Hiseq Xten	398	MSSA	Blood	China	Guangdong
1908BS13	Hiseq Xten	188	MSSA	Blood	China	Guangdong
1908BS14	Hiseq Xten	59	MRSA	Blood	China	Guangdong
1908BS17	Hiseq Xten	188	MSSA	Blood	China	Guangdong
1908BS18	Hiseq Xten	764	MRSA	Blood	China	Guangdong
1908BS19	Hiseq Xten	764	MRSA	Blood	China	Guangdong
1908BS21	Hiseq Xten	764	MRSA	Blood	China	Guangdong
1908BS22	Hiseq Xten	239	MRSA	Blood	China	Guangdong
1908BS25	Hiseq Xten	188	MSSA	Blood	China	Guangdong
1909BS01	Hiseq Xten	398	MSSA	Blood	China	Jiangsu
1909BS02	Hiseq Xten	7	MSSA	Blood	China	Jiangsu
1909BS03	Hiseq Xten	188	MSSA	Blood	China	Jiangsu
1909BS04	Hiseq Xten	188	MSSA	Blood	China	Jiangsu
1909BS05	Hiseq Xten	4513	MRSA	Blood	China	Jiangsu
1909BS07	Hiseq Xten	1281	MSSA	Blood	China	Jiangsu
1909BS08	Hiseq Xten	338	MRSA	Blood	China	Jiangsu
1909BS09	Hiseq Xten	5	MRSA	Blood	China	Jiangsu
1909BS11	Hiseq Xten	1281	MSSA	Blood	China	Jiangsu
1909BS12	Hiseq Xten	59	MRSA	Blood	China	Jiangsu
1909BS13	Hiseq Xten	4513	MRSA	Blood	China	Jiangsu
1909BS14	Hiseq Xten	764	MRSA	Blood	China	Jiangsu
1909BS17	Hiseq Xten	59	MRSA	Blood	China	Jiangsu
1909BS19	Hiseq Xten	6	MSSA	Blood	China	Jiangsu
1909BS22	Hiseq Xten	15	MSSA	Blood	China	Jiangsu
1909BS23	Hiseq Xten	398	MRSA	Blood	China	Jiangsu
1909BS25	Hiseq Xten	188	MSSA	Blood	China	Jiangsu
1909BS26	Hiseq Xten	1	MSSA	Blood	China	Jiangsu
1909BS27	Hiseq Xten	15	MSSA	Blood	China	Jiangsu
1909BS28	Hiseq Xten	398	MSSA	Blood	China	Jiangsu
1909BS29	Hiseq Xten	59	MRSA	Blood	China	Jiangsu
1909BS30	Hiseq Xten	59	MRSA	Blood	China	Jiangsu
1910BS02	Hiseq Xten	59	MRSA	Blood	China	Tianjin
1910BS04	Hiseq Xten	398	MSSA	Blood	China	Tianjin
1910BS05	Hiseq Xten	630	MSSA	Blood	China	Tianjin
1910BS07	Hiseq Xten	15	MSSA	Blood	China	Tianjin
1910BS08	Hiseq Xten	15	MSSA	Blood	China	Tianjin
1910BS09	Hiseq Xten	398	MSSA	Blood	China	Tianjin
1910BS10	Hiseq Xten	398	MSSA	Blood	China	Tianjin
1910BS11	Hiseq Xten	7	MSSA	Blood	China	Tianjin
1910BS12	Hiseq Xten	1	MSSA	Blood	China	Tianjin
1910BS13	Hiseq Xten	5	MSSA	Blood	China	Tianjin
1910BS14	Hiseq Xten	1	MSSA	Blood	China	Tianjin
1910BS15	Hiseq Xten	1	MSSA	Blood	China	Tianjin
1910BS16	Hiseq Xten	1	MSSA	Blood	China	Tianjin
1910BS17	Hiseq Xten	398	MSSA	Blood	China	Tianjin
1910BS18	Hiseq Xten	398	MSSA	Blood	China	Tianjin
1910BS19	Hiseq Xten	5	MSSA	Blood	China	Tianjin
1910BS20	Hiseq Xten	6	MSSA	Blood	China	Tianjin
1910BS22	Hiseq Xten	22	MSSA	Blood	China	Tianjin
1910BS23	Hiseq Xten	398	MSSA	Blood	China	Tianjin
1910BS24	Hiseq Xten	398	MSSA	Blood	China	Tianjin
1910BS25	Hiseq Xten	1	MSSA	Blood	China	Tianjin
1910BS26	Hiseq Xten	398	MSSA	Blood	China	Tianjin
1910BS27	Hiseq Xten	59	MRSA	Blood	China	Tianjin
1910BS28	Hiseq Xten	1281	MSSA	Blood	China	Tianjin
1910BS29	Hiseq Xten	15	MSSA	Blood	China	Tianjin
1910BS30	Hiseq Xten	5	MSSA	Blood	China	Tianjin
1911BS02	Hiseq Xten	2114	MSSA	Blood	China	Shanghai
1911BS04	Hiseq Xten	764	MRSA	Blood	China	Shanghai
1911BS05	Hiseq Xten	764	MRSA	Blood	China	Shanghai
1911BS06	Hiseq Xten	764	MRSA	Blood	China	Shanghai
1911BS08	Hiseq Xten	188	MSSA	Blood	China	Shanghai
1911BS09	Hiseq Xten	2631	MSSA	Blood	China	Shanghai
1911BS10	Hiseq Xten	398	MSSA	Blood	China	Shanghai
1911BS11	Hiseq Xten	630	MRSA	Blood	China	Shanghai
1911BS14	Hiseq Xten	15	MSSA	Blood	China	Shanghai
1911BS15	Hiseq Xten	5	MRSA	Blood	China	Shanghai
1911BS17	Hiseq Xten	1	MRSA	Blood	China	Shanghai
1912BS01	Hiseq Xten	5	MSSA	Blood	China	Shanxi
1912BS03	Hiseq Xten	338	MRSA	Blood	China	Shanxi
1912BS04	Hiseq Xten	239	MRSA	Blood	China	Shanxi
1912BS05	Hiseq Xten	22	MSSA	Blood	China	Shanxi
1912BS06	Hiseq Xten	59	MRSA	Blood	China	Shanxi
1912BS07	Hiseq Xten	59	MRSA	Blood	China	Shanxi
1912BS09	Hiseq Xten	5	MSSA	Blood	China	Shanxi
1912BS10	Hiseq Xten	239	MRSA	Blood	China	Shanxi
1912BS11	Hiseq Xten	239	MRSA	Blood	China	Shanxi
1912BS13	Hiseq Xten	630	MSSA	Blood	China	Shanxi
1912BS14	Hiseq Xten	1232	MRSA	Blood	China	Shanxi
1912BS16	Hiseq Xten	5	MRSA	Blood	China	Shanxi
1912BS17	Hiseq Xten	239	MRSA	Blood	China	Shanxi
1912BS18	Hiseq Xten	239	MRSA	Blood	China	Shanxi
1912BS19	Hiseq Xten	22	MSSA	Blood	China	Shanxi
1912BS20	Hiseq Xten	5	MRSA	Blood	China	Shanxi
1912BS21	Hiseq Xten	398	MSSA	Blood	China	Shanxi
1912BS22	Hiseq Xten	59	MRSA	Blood	China	Shanxi
1912BS23	Hiseq Xten	965	MSSA	Blood	China	Shanxi
1912BS24	Hiseq Xten	6	MSSA	Blood	China	Shanxi
1912BS25	Hiseq Xten	338	MRSA	Blood	China	Shanxi
1912BS26	Hiseq Xten	965	MSSA	Blood	China	Shanxi
1912BS28	Hiseq Xten	6	MSSA	Blood	China	Shanxi
1912BS29	Hiseq Xten	398	MRSA	Blood	China	Shanxi
1912BS30	Hiseq Xten	239	MRSA	Blood	China	Shanxi
1913BS02	Hiseq Xten	630	MSSA	Blood	China	Hunan
1913BS03	Hiseq Xten	188	MSSA	Blood	China	Hunan
1913BS07	Hiseq Xten	338	MRSA	Blood	China	Hunan
1913BS10	Hiseq Xten	1	MRSA	Blood	China	Hunan
1913BS13	Hiseq Xten	Unknown	MSSA	Blood	China	Hunan
1913BS14	Hiseq Xten	188	MSSA	Blood	China	Hunan
1913BS18	Hiseq Xten	188	MSSA	Blood	China	Hunan
1913BS19	Hiseq Xten	398	MSSA	Blood	China	Hunan
1913BS20	Hiseq Xten	59	MSSA	Blood	China	Hunan
1913BS21	Hiseq Xten	188	MSSA	Blood	China	Hunan
1913BS24	Hiseq Xten	1	MRSA	Blood	China	Hunan
1913BS25	Hiseq Xten	239	MRSA	Blood	China	Hunan
1913BS26	Hiseq Xten	2631	MSSA	Blood	China	Hunan
1913BS27	Hiseq Xten	398	MSSA	Blood	China	Hunan
1913BS28	Hiseq Xten	7	MSSA	Blood	China	Hunan
1913BS29	Hiseq Xten	188	MSSA	Blood	China	Hunan
1914BS02	Hiseq Xten	59	MRSA	Blood	China	Beijing
1914BS04	Hiseq Xten	15	MSSA	Blood	China	Beijing
1914BS05	Hiseq Xten	398	MSSA	Blood	China	Beijing
1914BS06	Hiseq Xten	239	MRSA	Blood	China	Beijing
1914BS08	Hiseq Xten	5	MRSA	Blood	China	Beijing
1914BS13	Hiseq Xten	1	MSSA	Blood	China	Beijing
1914BS15	Hiseq Xten	59	MRSA	Blood	China	Beijing
1914BS16	Hiseq Xten	398	MSSA	Blood	China	Beijing
1914BS17	Hiseq Xten	338	MRSA	Blood	China	Beijing
1914BS18	Hiseq Xten	239	MRSA	Blood	China	Beijing
1914BS19	Hiseq Xten	338	MRSA	Blood	China	Beijing
1914BS20	Hiseq Xten	22	MSSA	Blood	China	Beijing
1914BS21	Hiseq Xten	7	MSSA	Blood	China	Beijing
1914BS22	Hiseq Xten	5	MRSA	Blood	China	Beijing
1914BS24	Hiseq Xten	6	MSSA	Blood	China	Beijing
1914BS26	Hiseq Xten	59	MRSA	Blood	China	Beijing
1914BS28	Hiseq Xten	398	MSSA	Blood	China	Beijing
1914BS29	Hiseq Xten	5	MRSA	Blood	China	Beijing
1914BS30	Hiseq Xten	59	MRSA	Blood	China	Beijing
1915BS01	Hiseq Xten	59	MRSA	Blood	China	Chongqing
1915BS02	Hiseq Xten	59	MSSA	Blood	China	Chongqing
1915BS03	Hiseq Xten	22	MSSA	Blood	China	Chongqing
1915BS04	Hiseq Xten	398	MSSA	Blood	China	Chongqing
1915BS08	Hiseq Xten	59	MRSA	Blood	China	Chongqing
1915BS09	Hiseq Xten	188	MSSA	Blood	China	Chongqing
1915BS11	Hiseq Xten	1	MSSA	Blood	China	Chongqing
1915BS12	Hiseq Xten	188	MSSA	Blood	China	Chongqing
1915BS13	Hiseq Xten	5	MSSA	Blood	China	Chongqing
1915BS14	Hiseq Xten	7	MSSA	Blood	China	Chongqing
1915BS15	Hiseq Xten	Unknown	MSSA	Blood	China	Chongqing
1915BS16	Hiseq Xten	59	MRSA	Blood	China	Chongqing
1915BS17	Hiseq Xten	1281	MSSA	Blood	China	Chongqing
1915BS18	Hiseq Xten	188	MSSA	Blood	China	Chongqing
1915BS19	Hiseq Xten	5	MSSA	Blood	China	Chongqing
1915BS22	Hiseq Xten	5	MSSA	Blood	China	Chongqing
1915BS24	Hiseq Xten	7	MSSA	Blood	China	Chongqing
1915BS25	Hiseq Xten	22	MRSA	Blood	China	Chongqing
1915BS26	Hiseq Xten	1821	MSSA	Blood	China	Chongqing
1915BS27	Hiseq Xten	7	MSSA	Blood	China	Chongqing
1915BS29	Hiseq Xten	630	MSSA	Blood	China	Chongqing
1916BS01	Hiseq Xten	59	MRSA	Blood	China	Beijing
1916BS02	Hiseq Xten	59	MRSA	Blood	China	Beijing
1916BS04	Hiseq Xten	59	MRSA	Blood	China	Beijing
1916BS06	Hiseq Xten	764	MRSA	Blood	China	Beijing
1916BS08	Hiseq Xten	7	MSSA	Blood	China	Beijing
1916BS10	Hiseq Xten	188	MSSA	Blood	China	Beijing
1916BS11	Hiseq Xten	59	MRSA	Blood	China	Beijing
1916BS12	Hiseq Xten	3355	MRSA	Blood	China	Beijing
1916BS13	Hiseq Xten	15	MSSA	Blood	China	Beijing
1916BS15	Hiseq Xten	1281	MSSA	Blood	China	Beijing
1916BS16	Hiseq Xten	965	MSSA	Blood	China	Beijing
1916BS18	Hiseq Xten	59	MSSA	Blood	China	Beijing
1916BS20	Hiseq Xten	59	MRSA	Blood	China	Beijing
1916BS22	Hiseq Xten	22	MSSA	Blood	China	Beijing
1916BS23	Hiseq Xten	239	MRSA	Blood	China	Beijing
1916BS25	Hiseq Xten	398	MSSA	Blood	China	Beijing
1916BS28	Hiseq Xten	59	MRSA	Blood	China	Beijing
1916BS30	Hiseq Xten	15	MSSA	Blood	China	Beijing
1916BS31	Hiseq Xten	188	MSSA	Blood	China	Beijing
1916BS32	Hiseq Xten	15	MSSA	Blood	China	Beijing
1916BS33	Hiseq Xten	59	MRSA	Blood	China	Beijing
1916BS36	Hiseq Xten	5	MRSA	Blood	China	Beijing
1916BS40	Hiseq Xten	59	MSSA	Blood	China	Beijing
4sh26	Illumina Nextseq 550	239	MRSA	Blood	China	Shanghai
CY032	Illumina Nextseq 550	398	MSSA	Wound	China	Beijing
CY060	Illumina Nextseq 550	59	MSSA	Wound	China	Beijing
CY070	Illumina Nextseq 550	59	MSSA	Wound	China	Beijing
GS13002	Illumina Nextseq 550	59	MRSA	Blood	China	Guangdong
LA028	Illumina Nextseq 550	59	MSSA	Wound	China	Beijing
lc052	Illumina Nextseq 550	59	MRSA	Sputum	China	Shandong
lc060	Illumina Nextseq 550	59	MRSA	Sputum	China	Shandong
lc061	Illumina Nextseq 550	59	MRSA	Sputum	China	Shandong
lc063	Illumina Nextseq 550	59	MRSA	Sputum	China	Shandong
lc066	Illumina Nextseq 550	59	MRSA	Sputum	China	Shandong
lc085	Illumina Nextseq 550	59	MRSA	Sputum	China	Shandong
lc094	Illumina Nextseq 550	59	MRSA	Sputum	China	Shandong
PG037	Illumina Nextseq 550	59	MSSA	Wound	China	Beijing
PG040	Illumina Nextseq 550	398	MSSA	Wound	China	Beijing
PG072	Illumina Nextseq 550	398	MSSA	Wound	China	Beijing
PG074	Illumina Nextseq 550	398	MSSA	Wound	China	Beijing
ZY01	Illumina Nextseq 550	59	MRSA	Blood	China	Zhejiang
